# Supplementary material
Source: publisher site journal article supplement (http://www.kjim.org/upload/media/kjim-2020-656-suppl5.pdf)
Supplement: Supplementary file 1 [file kjim-2020-656-suppl5.pdf]

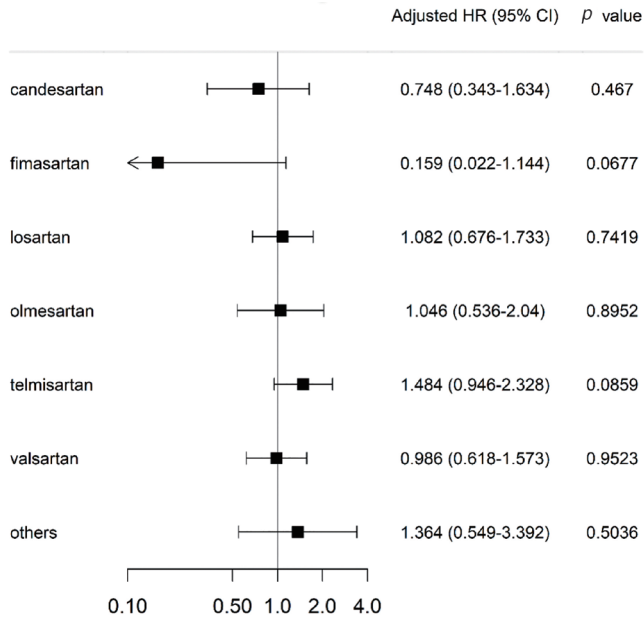

**Supplementary Figure 2.** Subgroup analysis for survival within 60 days by each angiotensin receptor blocker. Only individual drugs having sufficient prescription numbers for analysis were analyzed. HR, hazard ratio; CI, confidence interval.
